# Supplementary material for: Identifying the spatiotemporal variations of ozone formation regimes across China from 2005 to 2019 based on polynomial simulation and causality analysis
Source: Copernicus journal article supplement (doi:10.5194/acp-2021-291), 2021-04-30
Supplement: Supplementary file 1 [file acp-2021-291-supplement.pdf]

1  
2  
3  
4  
5  
6  
7  
8  
9  
10  
11  
12  
13  
14  
15

## Supporting Information for

### **Identifying the spatiotemporal variations of ozone formation regimes across China from 2005 to 2019 based on polynomial simulation and causality analysis**

Ruiyuan Li<sup>1</sup>, Miaoqing Xu<sup>1</sup>, Manchun Li<sup>2</sup>, Ziyue Chen<sup>1\*</sup>, Bingbo Gao<sup>3</sup>, Na Zhao<sup>4,5</sup>, Qi  
Yao<sup>1</sup>

<sup>1</sup>State Key Laboratory of Remote Sensing Science, College of Global Change and Earth System  
Sciences, Beijing Normal University, Beijing, 100875, China

<sup>2</sup>School of Geography and Ocean Science, Nanjing University, Nanjing, 210023, China.

<sup>3</sup>College of Land Science and Technology, China Agriculture University, Beijing, 100083,  
China.

<sup>4</sup>State Key Laboratory of Resources and Environment Information System, Institute of  
Geographic Sciences and Natural Resources Research, Chinese Academy of Sciences, Beijing,  
100049, China

<sup>5</sup>University of Chinese Academy of Sciences, Beijing, 100080, China

\*Corresponding author: E-mail: [zychen@bnu.edu.cn](mailto:zychen@bnu.edu.cn), Tel numbers: +86-010-5880008.

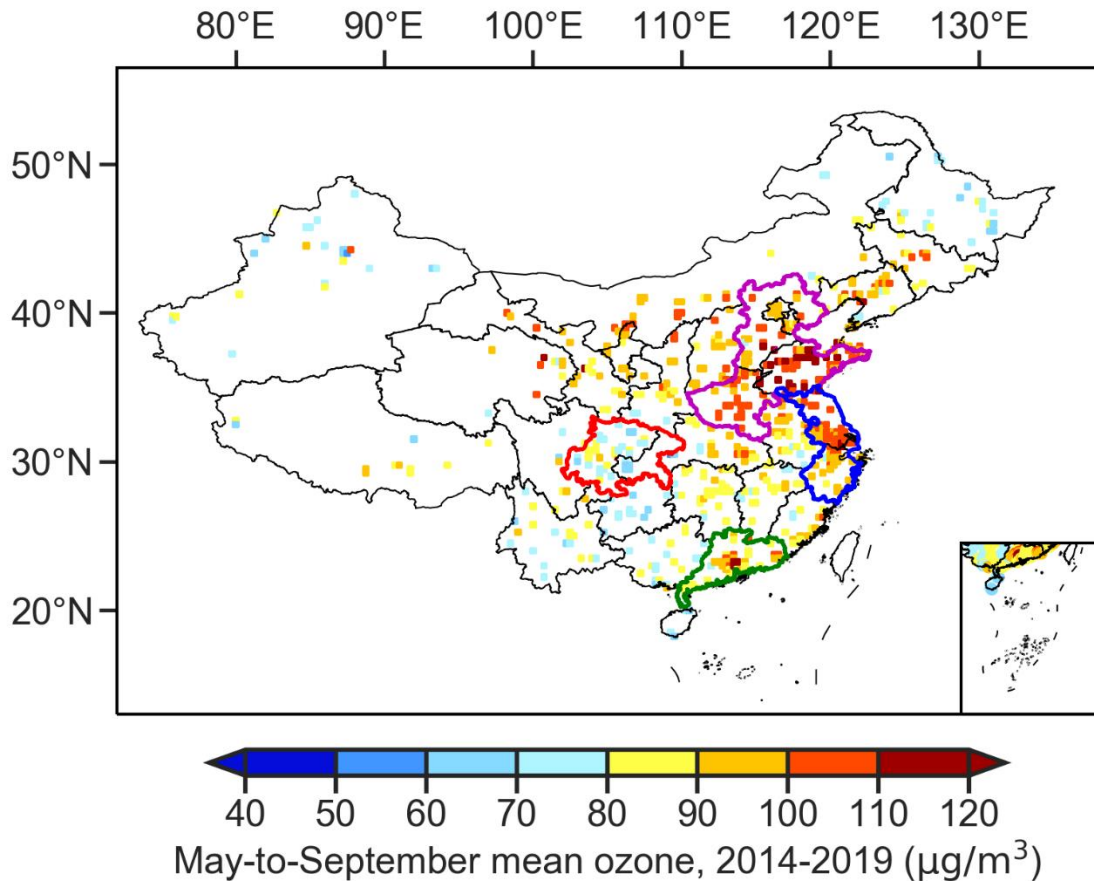

16

17 **Fig. S1. The May-to-September mean hourly surface ozone network data from**  
 18 **2014 to 2019. Mean hourly surface ozone concentrations were calculated on the**  
 19  **$0.25^\circ \times 0.25^\circ$  grid. Purple, blue, green and red outlines indicate the boundaries of**  
 20 **North China Plain (NCP), Yangtze River delta (YRD), Pearl River delta (PRD),**  
 21 **and Sichuan Basin (SCB), respectively.**

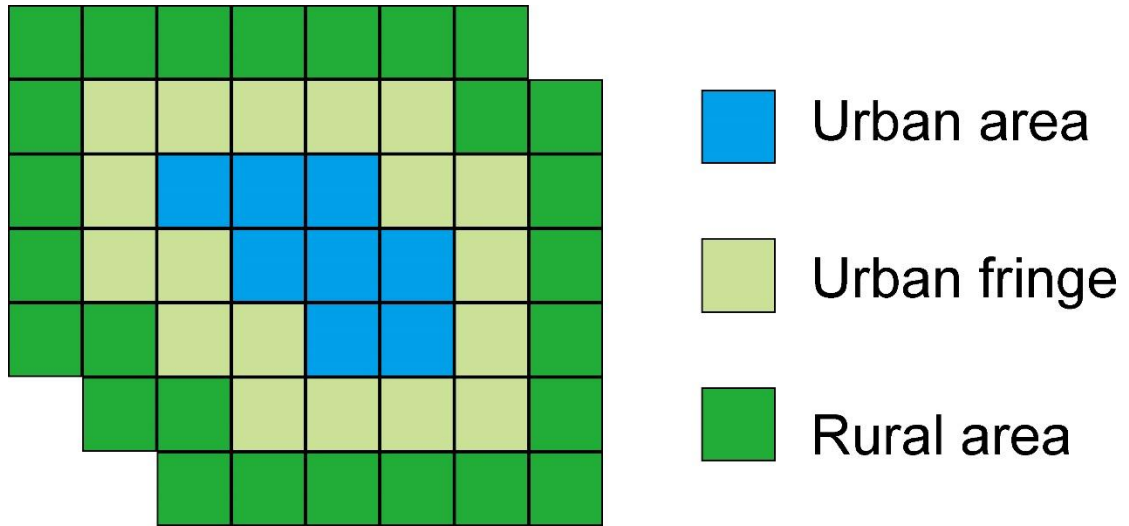

22

23 **Fig. S2.** The geographical locations of urban area, urban fringe and rural area.

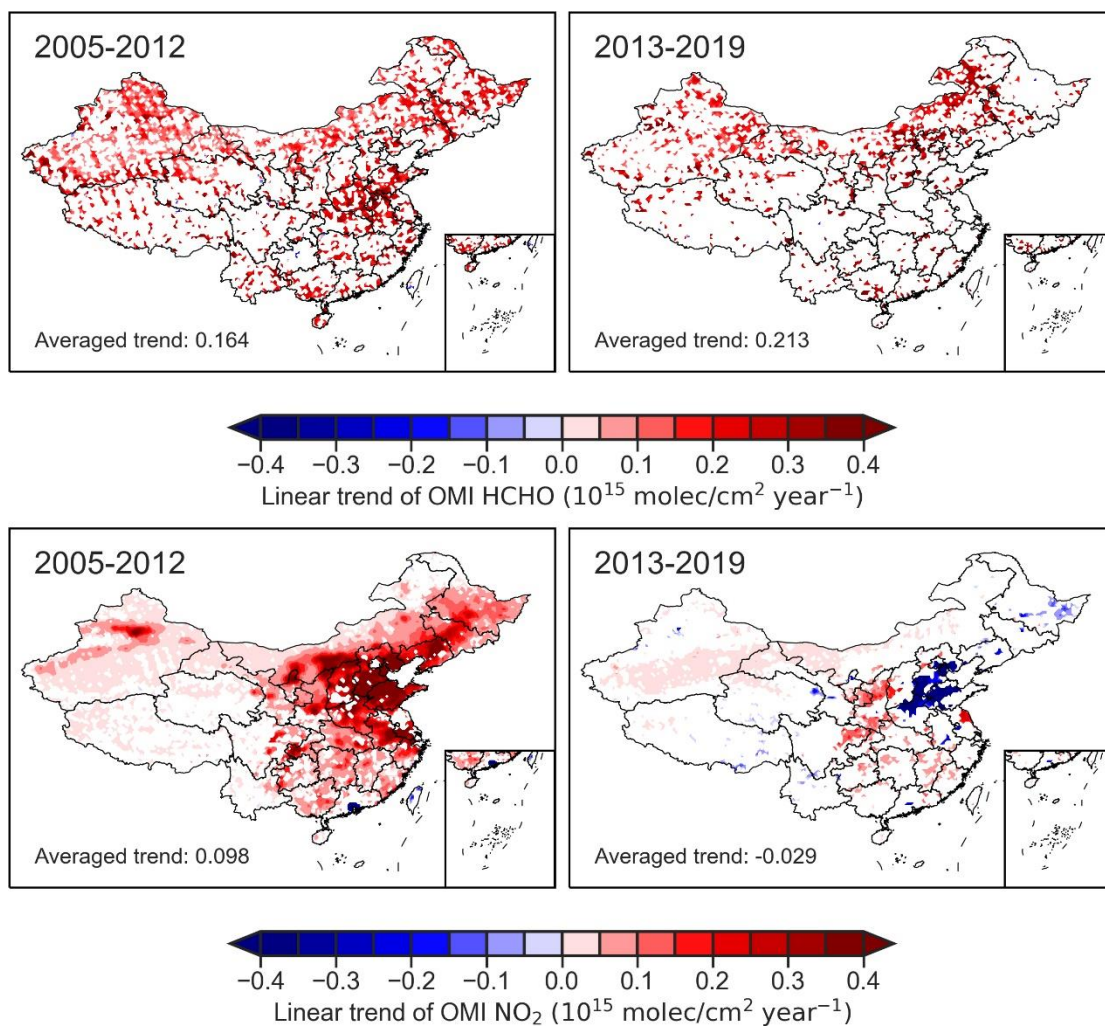

24

25 **Fig. S3. The linear trends of May-to-September HCHO and NO<sub>2</sub> across China**

26 **during the period of 2005-2012 and 2013-2019.**

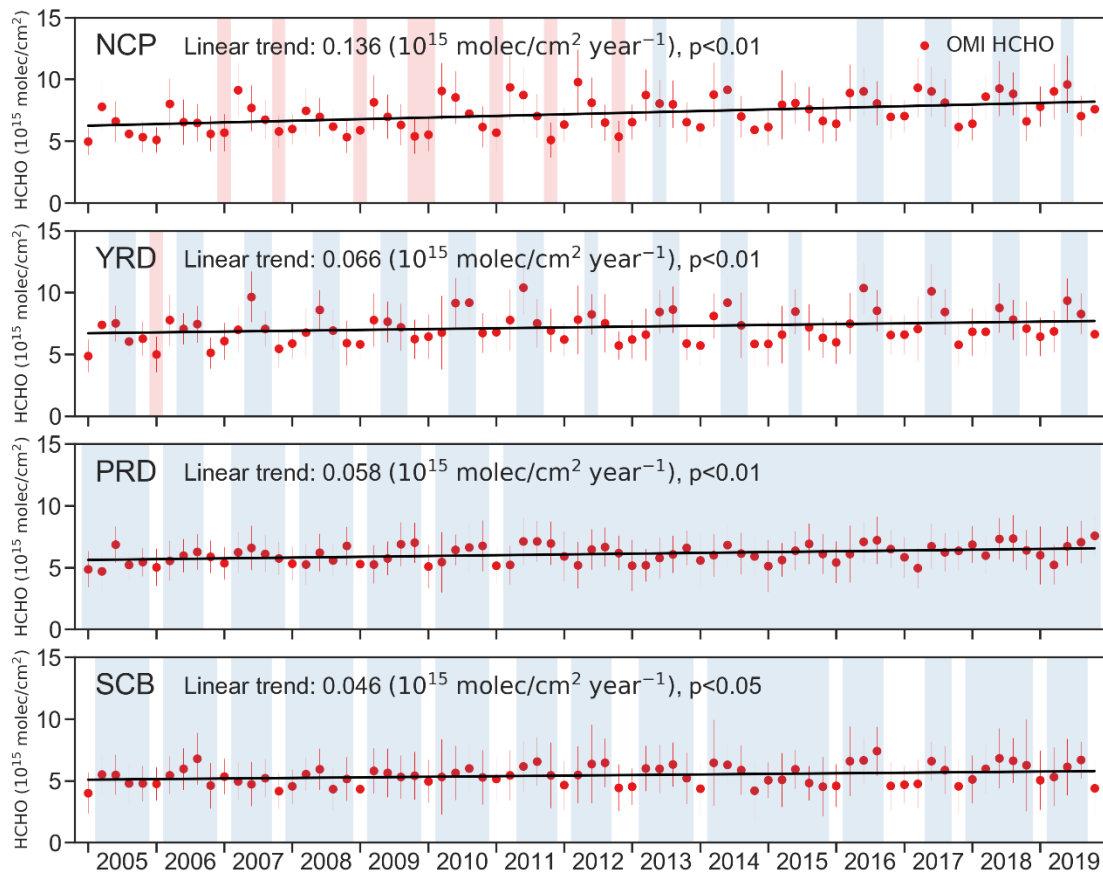

27

28 **Fig. S4. The time series of HCHO columns in the four megacity clusters from 2005**  
 29 **to 2019. Black lines indicate the linear trend of HCHO columns. Red, white and**  
 30 **blue areas stand for VOC-limited, transitional and NO<sub>x</sub>-limited regimes,**  
 31 **respectively.**

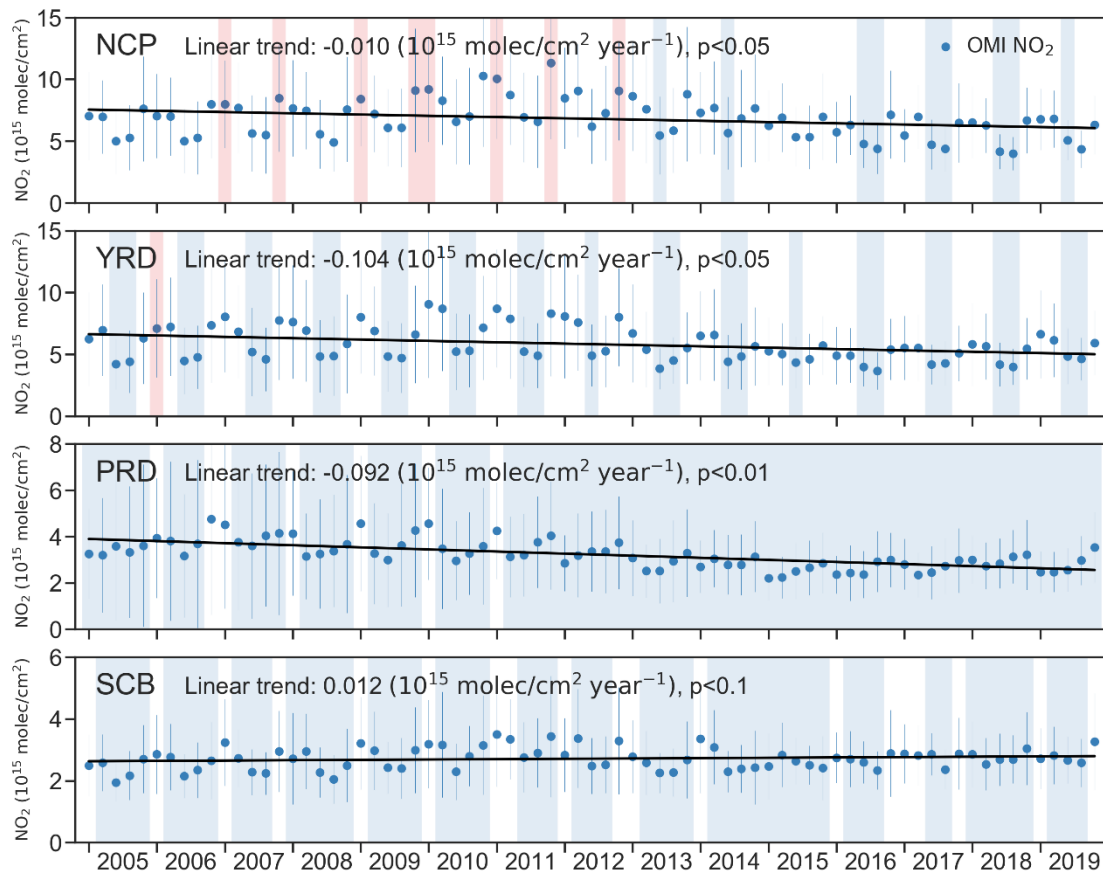

32

33 **Fig. S5. The time series of  $\text{NO}_2$  columns in the four megacity clusters from 2005 to**  
 34 **2019. Black lines indicate the linear trend of  $\text{NO}_2$  columns. Red, white and blue**  
 35 **areas stand for VOC-limited, transitional and  $\text{NO}_x$ -limited regimes, respectively.**

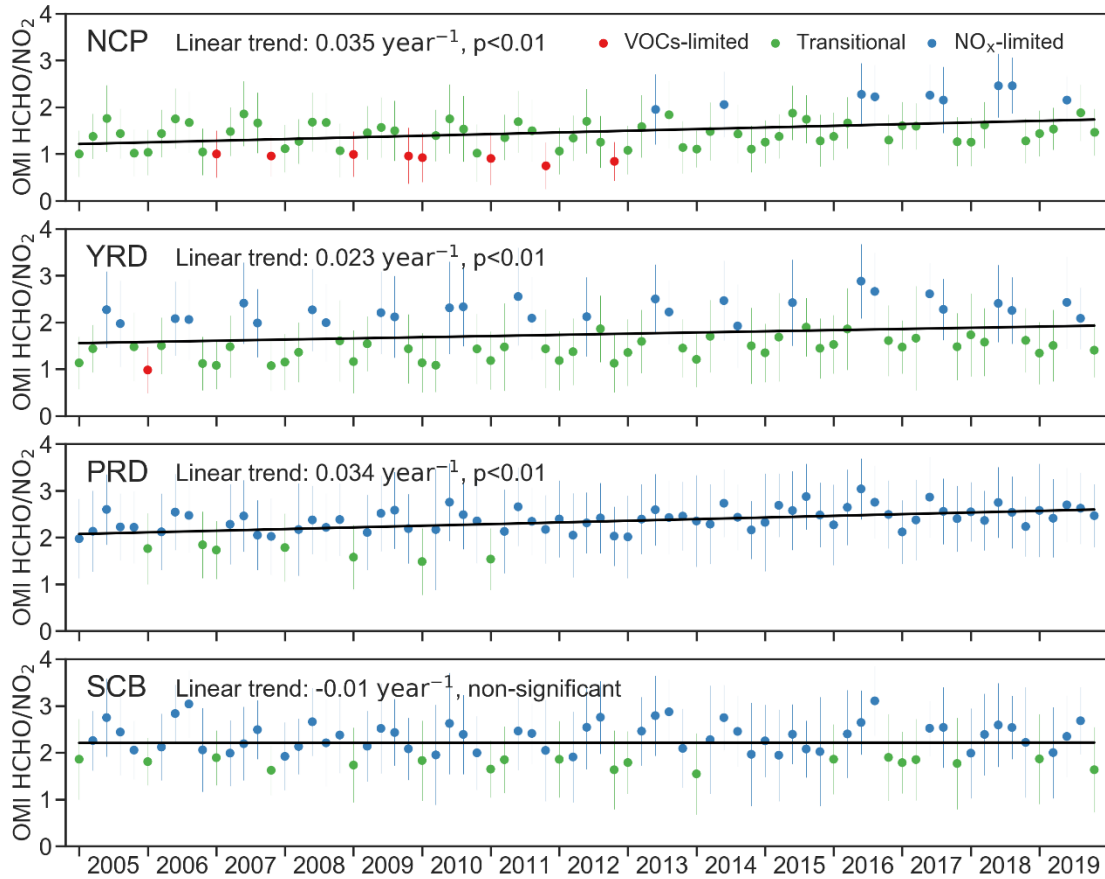

36

37 **Fig. S6. The time series of HCHO/NO<sub>2</sub> in the four megacity clusters from 2005 to**  
 38 **2019. Black lines indicate the linear trend of HCHO/NO<sub>2</sub>. Red, green and blue dots**  
 39 **stand for VOC-limited, transitional and NO<sub>x</sub>-limited regimes, respectively.**
